# Supplementary material
Source: publisher figshare collection journal article supplement (https://sage.figshare.com/ndownloader/files/37924669)
Supplement: Supplementary file 1 [file 37924669]

**Supplementary Table S1.** Search strategies 1A. Ovid MEDLINE, Embase and PsychInfo; 1B. CINAHL; 1C. Cochrane Database of Systematic Reviews.

**A**

|  | **Embase Classic+Embase**1947 to 2022 August 19**,  Ovid MEDLINE(R) and Epub Ahead of Print, In-Process, In-Data-Review & Other Non-Indexed Citations and Daily**1946 to August, 2022**,****APA PsycInfo**1806 to August Week 3 2022 |
| --- | --- |
| 1. | ((neuro* or nervous system) and (disease* or disorder* or impair* or disable* or disabilit* or injur* or dysfunction* or degenerat* or trauma* or illness* or condition* or syndrom*)).mp. |
| 2. | stroke.mp. |
| 3. | exp stroke/ or brain infarction/ or brain stem infarctions/ or cerebral infarction/ or hemorrhagic stroke/ or ischemic stroke/ or thrombotic stroke/ or stroke, lacunar/ |
| 4. | (parkinson* or PD).mp. |
| 5. | exp parkinsonian disorders/ or exp parkinson disease/ or parkinson disease, secondary/ |
| 6. | (multiple sclerosis or MS).mp. |
| 7. | exp multiple sclerosis/ or multiple sclerosis, chronic progressive/ or multiple sclerosis, relapsing-remitting/ |
| 8. | (brain injur* or acquired brain injur* or hypoxic brain injur* or traumatic brain injur*).mp. |
| 9. | exp brain injuries/ or brain hemorrhage, traumatic/ or brain injuries, diffuse/ or brain injuries, traumatic/ or brain injury, chronic/ |
| 10. | (motor neuron disease or MND).mp. |
| 11. | (Amyotrophic Lateral Sclerosis or ALS).mp. |
| 12. | exp motor neuron disease/ or amyotrophic lateral sclerosis/ or bulbar palsy, progressive/ |
| 13. | (spinal cord injur* or SCI).mp. |
| 14. | exp spinal cord compression/ or exp spinal cord injuries/ or central cord syndrome/ or exp spinocerebellar degenerations/ or spinocerebellar ataxias/ |
| 15. | (alzheimer* dementia or vascular dementia or dementia).mp. |
| 16. | exp dementia/ or exp alzheimer disease/ or exp dementia, vascular/ or cadasil/ or dementia, multi-infarct/ |
| 17. | exp central nervous system diseases/ or exp brain diseases/ or exp brain injuries/ or exp cerebellar diseases/ or cerebellar ataxia/ or exp cerebrovascular disorders/ |
| 18. | 1 or 2 or 3 or 4 or 5 or 6 or 7 or 8 or 9 or 10 or 11 or 12 or 13 or 14 or 15 or 16 or 17 |
| 19. | exp telemedicine/ or exp telerehabilitation/ |
| 20. | exp Videoconferencing/ or exp Remote Consultation/ |
| 21. | (ehealth* or e-health* or e health* or electronic-health* or electronic health* or mhealth* or m-health* or m health* or mobile health* or mobile-health* or emedic* or e-medic* or e medic* or electronic-medic* or electronic-medic*).mp. |
| 22. | (videoconferenc* or video-conferenc* or video conferenc* or teleconsult* or tele-consult* or tele consult* or teleconferenc* or tele-conferenc* or tele conferenc* or videoconsult* or video-consult* or video consult*).mp. |
| 23. | (interactive adj (health communicat* or video* or technolog* or multimedia)).mp. |
| 24. | ((digital health or digital) adj intervention*).mp. |
| 25. | (telehealth* or tele-health* or tele health or telemedic* or tele-medic* or telemedic* or telerehab* or tele-rehab* or tele rehab* or teleconsult* or tele-consult* or tele consult* or telemonitor* or tele-monitor* or tele monitor*).mp. |
| 26. | 19 or 20 or 21 or 22 or 23 or 24 or 25 |
| 27. | accident prevention/ or exp accidental falls/ or accidents, home/ |
| 28. | (fall* or trip* or slip*).mp. |
| 29. | occupational therap*.mp. |
| 30. | ((home or house) adj modif*).mp. |
| 31. | (fall* adj2 (prevent* or risk* or education*)).mp. |
| 32. | exp EXERCISE/ |
| 33. | exp Exercise Therapy/ |
| 34. | exp REHABILITATION/ |
| 35. | (physiotherap* or physical therap* or physical activ* or physical train* or physical condition* or exercise* or rehab* or exercise therap* or exercise train*).mp. |
| 36. | 27 or 28 or 29 or 30 or 31 or 32 or 33 or 34 or 35 |
| 37. | 18 and 26 and 36 |
| 38. | limit 37 to english language |

**B**

| **CINAHL Complete.** Date: August 19, 2022 Filters: English Language only | |
| --- | --- |
| S35 | S19 AND S33 AND S34 |
| S34 | S20 OR S21 OR S22 OR S23 OR S24 |
| S33 | S25 OR S26 OR S27 OR S28 OR S29 OR S30 OR S31 OR S32 |
| S32 | physiotherap* or "physical therap*" or "physical activ*" or "physical train*" or "physical condition*" or exercise* or rehab* or "exercise therap*" or "exercise train*" |
| S31 | (MH "Rehabilitation+") OR (MH "Home Rehabilitation+") |
| S30 | (MH "Abdominal Exercises") OR (MH "Aerobic Exercises") OR (MH "Core Exercises") OR (MH "Endurance Training") OR (MH "Lower Extremity Exercises") OR (MH "Muscle Strengthening") OR (MH "Pilates") OR (MH "Stretching") OR (MH "Walking") OR (MH  "Home Maintenance") OR (MH "Exercise Physiology") |
| S29 | (fall* N2 (prevent* or risk* or education*)) |
| S28 | ((home or house) N1 modif*) |
| S27 | "occupational therap*" |
| S26 | fall* or trip* or slip* |
| S25 | (MH "Accidental Falls") OR (MH "Safety Behavior: Fall Prevention (Iowa NOC)") |
| S24 | telehealth* or "tele-health*" or "tele health" or telemedic* or "tele-medic*" or telemedic* or telerehab* or "tele-rehab*" or "tele rehab*" or teleconsult* or "tele- consult*" or "tele consult*" or telemonitor* or "tele-monitor*' or "tele monitor*" |
| S23 | (("digital health" or digital) N1 intervention*) |
| S22 | videoconferenc* or "video-conferenc*" or "video conferenc*" or teleconsult* or "teleconsult*" or "tele consult*" or teleconferenc* or "tele-conferenc*" or "tele conferenc*" or videoconsult* or "video-consult*" or "video consult*" |
| S21 | ehealth* or "e-health*" or "e health*" or "electronic-health*" or "electronic health*" or mhealth* or "m-health*" or "m health*" or "mobile health*" or "mobile-health*" or emedic* or "e-medic*" or "e medic*" or "electronic-medic*" or "electronic- medic*" |
| S20 | (MH "Telehealth") OR (MH "Telenursing") OR (MH "Telephone") OR (MH  "Telemedicine") OR (MH "Videoconferencing") |
| S19 | S1 OR S2 OR S3 OR S4 OR S5 OR S6 OR S7 OR S8 OR S9 OR S10 OR S11 OR  S12 OR S13 OR S14 OR S15 OR S16 OR S17 OR S18 |
| S18 | (MH "Central Nervous System Diseases+") |
| S17 | (MH "Dementia") OR (MH "Frontotemporal Dementia") OR (MH "Dementia, Vascular")  OR (MH "Dementia, Multi-Infarct") |
| S16 | "alzheimer* dementia "or "vascular dementia" or dementia |
| S15 | (MH "Spinal Cord Injuries+") OR (MH "Central Cord Syndrome") OR (MH "Spinal Cord  Neoplasms") OR (MH "Spinal Cord Diseases+") |
| S14 | "spinal cord injur*" |
| S13 | (MH "Amyotrophic Lateral Sclerosis") |
| S12 | (MH "Motor Neuron Diseases") |
| S11 | "Amyotrophic Lateral Sclerosis" or ALS |
| S10 | "motor neuron disease" or MND |
| S9 | (MH "Right Hemisphere Injuries") OR (MH "Brain Injuries+") OR (MH "Left Hemisphere  Injuries") OR (MH "Brain Neoplasms") OR (MH "Cerebellar Diseases") OR (MH "Hypoxia, Brain") |
| S8 | "brain injur*" or "acquired brain injur*" or "hypoxic brain injur*" or "traumatic brain injur*" |
| S7 | (MH "Multiple Sclerosis+") |
| S6 | "multiple sclerosis" or MS |
| S5 | (MH "Parkinson Disease") |
| S4 | parkinson* or PD |
| S3 | (MH "Stroke+") OR (MH "Stroke Patients") OR (MH "Stroke, Lacunar") |
| S2 | Stroke |
| S1 | ((neuro* or "nervous system") and (disease* or disorder* or impair* or disable* or disabilit* or injur* or dysfunction* or degenerat* or trauma* or illness* or condition* or syndrom*)) |

**D**

| **Cochrane Library. 1946 to August 19th, 2022.** | |
| --- | --- |
| #1 | MeSH descriptor: [Nervous System Diseases] explode all trees |
| #2 | ("nervous system diseases"):ti,ab,kw |
| #3 | MeSH descriptor: [Stroke] explode all trees |
| #4 | ("stroke"):ti,ab,kw |
| #5 | MeSH descriptor: [Parkinson Disease] explode all trees |
| #6 | ("Parkinson disease"):ti,ab,kw |
| #7 | ("Parkinsonian syndrome"):ti,ab,kw |
| #8 | ("Parkinson's disease"):ti,ab,kw |
| #9 | (PD):ti,ab,kw |
| #10 | MeSH descriptor: [Multiple Sclerosis] explode all trees |
| #11 | ("multiple sclerosis"):ti,ab,kw |
| #12 | (MS):ti,ab,kw |
| #13 | MeSH descriptor: [Brain Injuries] 2 tree(s) exploded |
| #14 | (Brain injur*):ti,ab,kw |
| #15 | MeSH descriptor: [Motor Neuron Disease] explode all trees |
| #16 | (motor neuron disease*):ti,ab,kw |
| #17 | (MND):ti,ab,kw |
| #18 | MeSH descriptor: [Cerebellar Diseases] explode all trees |
| #19 | ("Cerebellar disease*"):ti,ab,kw |
| #20 | MeSH descriptor: [Brain Diseases] explode all trees |
| #21 | (Brain disease*):ti,ab,kw |
| #22 | MeSH descriptor: [Cerebrovascular Disorders] explode all trees |
| #23 | ("cerebrovascular accident*" or "cerebrovascular disorder*"):ti,ab,kw |
| #24 | MeSH descriptor: [Spinal Cord Injuries] 2 tree(s) exploded |
| #25 | ("spinal cord injur*"):ti,ab,kw |
| #26 | MeSH descriptor: [Cerebellar Ataxia] explode all trees |
| #27 | ("Cerebellar ataxia"):ti,ab,kw |
| #28 | MeSH descriptor: [Dementia] explode all trees |
| #29 | (Dementia):ti,ab,kw |
| #30 | #1 OR #2 OR #3 OR #4 OR #5 OR #6 OR #7 OR #8 OR #9 OR #10 OR #11 OR #12  OR #13 OR #14 OR #15 OR #16 OR #17 OR #18 OR #19 OR #20 OR #21 OR #22 OR #23 OR #24 OR #25 OR #26 OR #27 OR #28 OR #29 |
| #31 | MeSH descriptor: [Telemedicine] explode all trees |
| #32 | (tele-medicine OR telemedicine):ti,ab,kw |
| #33 | MeSH descriptor: [Telerehabilitation] explode all trees |
| #34 | (telehealth or tele-health):ti,ab,kw |
| #35 | ("tele-healthcare" or telehealthcare):ti,ab,kw |
| #36 | MeSH descriptor: [Remote Consultation] explode all trees |
| #37 | ("remote consultation"):ti,ab,kw |
| #38 | (e-health OR ehealth):ti,ab,kw |
| #39 | (m-health or mhealth or "mobile health" or "electronic health"):ti,ab,kw |
| #40 | ((mobile OR digital or electronic) NEAR Intervention):ti,ab,kw |
| #41 | ("video conferenc*" or "video-conferenc*"):ti,ab,kw |
| #42 | ("video consult*"):ti,ab,kw |
| #43 | ("interactive multimedia"):ti,ab,kw |
| #44 | (interactive technolog*):ti,ab,kw |
| #45 | #32 OR #33 OR #34 or #35 OR #36 OR #37 OR #38 OR #39 OR #40 OR #41 OR #42 OR #43 OR #44 OR #45 |
| #46 | MeSH descriptor: [Accidental Falls] explode all trees |
| #47 | (Fall (risk* or efficacy)):ti,ab,kw |
| #48 | ("fall prevention"):ti,ab,kw |
| #49 | (Fall* or Trip* or slip*) |
| #50 | MeSH descriptor: [Occupational Therapy] explode all trees |
| #51 | (occupational therapy):ti,ab,kw |
| #52 | (home or house Near/1 modification):ti,ab,kw |
| #53 | fall (prevent* or risk* or education*) |
| #54 | #47 OR #48 or #49 or #50 or #51 or #52 or #53 or #54 |
| #55 | MeSH descriptor: [Exercise] explode all trees |
| #56 | "exercise therapy":ti,ab,kw |
| #57 | MeSH descriptor: [Physical Therapy Modalities] 1 tree(s) exploded |
| #58 | ("rehabilitation"):ti,ab,kw |
| #59 | (physiotherap*):ti,ab,kw |
| #60 | (Physical (Therapy or activ* or train* or exercise*)):ti,ab,kw |
| #61 | ("Exercise train*"):ti,ab,kw |
| #62 | #55 or #56 or #57 or #58 or #59 or #60 or #61 |
| #63 | #54 OR #62 |
| #64 | #30 AND #45 AND #63 |
